# Supplementary material for: Antimicrobials use and resistance on integrated poultry-fish farming systems in the Ayeyarwady Delta of Myanmar
Source: PubMed Central journal article supplement (PMC7528085; doi:10.1038/s41598-020-73076-2), 2020-09-30
Supplement: 41598_2020_73076_MOESM1_ESM.pdf [file 41598_2020_73076_MOESM1_ESM.pdf]

**Antimicrobials use and resistance on integrated poultry-fish farming systems in the Ayeyarwady Delta of Myanmar**

Justine S. Gibson<sup>1\*</sup>, Honey Wai<sup>2</sup>, Shwe Sin May Lwin Oo<sup>2</sup>, Ei Moh Moh Hmwe<sup>2</sup>, Soe Soe Wai<sup>2</sup>, Lat Lat Htun<sup>2</sup>, Hwee Ping Lim<sup>1</sup>, Zin Min Latt<sup>3</sup>, Joerg Henning<sup>1</sup>

<sup>1</sup> School of Veterinary Science, The University of Queensland, Gatton, QLD, Australia

<sup>2</sup> University of Veterinary Science, Yezin, Myanmar

<sup>3</sup> Livestock Breeding and Veterinary Department, Nay Pyi Taw, Myanmar

**Supplementary Table S1.** Cross-tabulation of types of antimicrobials and medications used for poultry and frequency of application in integrated chicken-fish farms in the Ayeyarwady Delta of Myanmar.

| Antimicrobials                                                             | Type of application       |            |                       |            |             |            | Total users |
|----------------------------------------------------------------------------|---------------------------|------------|-----------------------|------------|-------------|------------|-------------|
|                                                                            | Prophylactic - once daily |            | Use on “special” days |            | Therapeutic |            |             |
|                                                                            | N users                   | Percentage | N users               | Percentage | N users     | Percentage |             |
| <b><i>Amoxicillin and colistin products</i></b>                            |                           |            |                       |            |             |            |             |
| Amoxicillin                                                                | 24                        | 33.3       | 25                    | 34.7       | 23          | 32.0       | 72          |
| Colistin                                                                   | 7                         | 46.7       | 3                     | 20.0       | 5           | 33.3       | 15          |
| Octamix (amoxicillin and colistin)                                         | 55                        | 43.7       | 47                    | 37.3       | 24          | 19.0       | 126         |
| <b><i>Fluoroquinolones (ciprofloxacin, enrofloxacin and ofloxacin)</i></b> |                           |            |                       |            |             |            |             |
| Fluoroquinolone                                                            | 2                         | 28.6       | 5                     | 71.4       | 0           | 0.0        | 7           |
| Ciprofloxacin                                                              | 4                         | 36.4       | 1                     | 9.1        | 6           | 54.5       | 11          |
| Enrofloxacin                                                               | 29                        | 29.9       | 56                    | 57.7       | 12          | 12.4       | 97          |
| Ofloxacin                                                                  | 12                        | 50.0       | 3                     | 12.5       | 9           | 37.5       | 24          |
| <b><i>Aminoglycosides</i></b>                                              |                           |            |                       |            |             |            |             |
| Neomycin                                                                   | 3                         | 60.0       | 2                     | 40.0       | 0           | 0.0        | 5           |
| Streptomycin                                                               | 1                         | 16.7       | 0                     | 0.0        | 5           | 83.3       | 6           |
| <b><i>Tetracyclines</i></b>                                                |                           |            |                       |            |             |            |             |
| Doxycycline                                                                | 3                         | 27.3       | 5                     | 45.4       | 3           | 27.3       | 11          |
| Oxytetracycline                                                            | 0                         | 0.0        | 1                     | 100.0      | 0           | 0.0        | 1           |
| <b><i>Macrolide</i></b>                                                    |                           |            |                       |            |             |            |             |
| Tylosin                                                                    | 14                        | 25.0       | 28                    | 50.0       | 14          | 25.0       | 56          |
| <b><i>Lincosamide</i></b>                                                  |                           |            |                       |            |             |            |             |
| Lincomycin                                                                 | 2                         | 28.6       | 2                     | 28.6       | 3           | 42.8       | 7           |
| <b><i>Folic acid inhibitors</i></b>                                        |                           |            |                       |            |             |            |             |
| Sulfamethoxazole/ trimethoprim                                             | 5                         | 35.7       | 2                     | 14.3       | 7           | 50.0       | 14          |
| Sulfadiazine                                                               | 1                         | 16.7       | 1                     | 16.7       | 4           | 66.6       | 6           |

**Supplementary Table S2:** Resistant phenotype of 183 *E. coli* cultured from chicken faecal samples on integrated chicken-fish farming systems in the Ayeyarwady Delta of Myanmar.

| Antimicrobial categories                                                                                                   | Multidrug resistant pattern | Number of isolates |
|----------------------------------------------------------------------------------------------------------------------------|-----------------------------|--------------------|
| <b>Resistance to six antimicrobial categories (N = 2)</b>                                                                  |                             |                    |
| Penicillins, tetracycline, folate pathway inhibitors, fluoroquinolone, aminoglycoside, polymyxins                          | AMP, TET, SXT, ENR, GEN,C   | 1                  |
| Penicillins, penicillins & $\beta$ -lactam inhibitors, cephamycins, folate pathway inhibitors, fluoroquinolone, polymyxins | AMC, AMP, FOX, SXT, ENR, C  | 1                  |
| <b>Resistance to five antimicrobial categories (N = 8)</b>                                                                 |                             |                    |
| Penicillins, tetracycline, folate pathway inhibitors, fluoroquinolone, aminoglycoside                                      | AMP, TET, SXT, ENR, GEN     | <b>3</b>           |
|                                                                                                                            | AMP, TET, SXT, ENR, N       | 1                  |
|                                                                                                                            | AMP, TET, SXT, ENR, GEN, N  | 1                  |
| Penicillins, penicillins & $\beta$ -lactam inhibitors, folate pathway inhibitors, fluoroquinolone, aminoglycoside          | AMP, AMC, SXT ENR, GEN      | 1                  |
| Penicillin, non-extended spectrum cephalosporin, tetracycline, folate pathway inhibitors, fluoroquinolone                  | AMP, KF, TET, SXT, ENR      | 2                  |
| <b>Resistance to four antimicrobial categories (N = 24)</b>                                                                |                             |                    |
| Penicillins, tetracycline, folate pathway inhibitors, fluoroquinolone                                                      | AMP, TET, SXT, ENR          | 13                 |
| Penicillins, folate pathway inhibitors, fluoroquinolone, aminoglycoside                                                    | AMP, SXT, ENR, GEN          | 4                  |
|                                                                                                                            | AMP, SXT, ENR, N            | 1                  |
| Penicillins, aminoglycoside, tetracycline, folate pathway inhibitors                                                       | AMP,GEN,TET,SXT             | 1                  |
| Folate pathway inhibitors, fluoroquinolone, aminoglycoside, tetracycline                                                   | SXT, ENR, GEN, TET          | 2                  |
| Penicillins, penicillins & $\beta$ -lactam inhibitors, tetracycline, folate pathway inhibitors                             | AMP, AMC, TET, SXT          | 1                  |
| Penicillins, non-extended spectrum cephalosporin, tetracycline, folate pathway inhibitors                                  | AMP, KF, TET, SXT           | 1                  |
| Penicillin, non-extended spectrum cephalosporin, cephamycin, aminoglycoside                                                | AMP, KF, FOX, GEN           | 1                  |
| <b>Resistance to three antimicrobial categories (N = 31)</b>                                                               |                             |                    |
| Penicillin, tetracycline, folate pathway inhibitors                                                                        | AMP, TET, SXT               | 7                  |
|                                                                                                                            |                             |                    |
| Penicillin, tetracycline, fluoroquinolone                                                                                  | AMP, TET, ENR               | 4                  |

|                                                                                            |               |    |
|--------------------------------------------------------------------------------------------|---------------|----|
| Penicillins & $\beta$ -lactam inhibitors, tetracycline, fluoroquinolone                    | AMC, TET, ENR | 1  |
| Penicillin, fluoroquinolone, folate pathway inhibitors                                     | AMP, ENR, SXT | 3  |
| Pencillin, fluoroquinolone, aminoglycoside                                                 | AMP, ENR, GEN | 1  |
|                                                                                            | AMP, ENR, N   | 1  |
| Folate pathway inhibitors, fluoroquinolone, aminoglycoside                                 | SXT, ENR, GEN | 2  |
|                                                                                            | SXT, ENR, N   | 1  |
| folate pathway inhibitors, fluoroquinolone, tetracycline                                   | SXT, TET, ENR | 1  |
| Aminoglycoside, fluoroquinolone, tetracycline                                              | GEN, ENR, TET | 1  |
| Polymyxin, folate pathway inhibitors, aminoglycoside                                       | C, SXT,N      | 1  |
| Penicillins, penicillins & $\beta$ -lactam inhibitors, tetracycline                        | AMP, AMC, TET | 1  |
| Penicillins, non-extended spectrum cephalosporin, tetracycline                             | AMP, KF, TET  | 5  |
| Non-extended spectrum cephalosporin, penicillins & $\beta$ -lactam inhibitors, cephamycin  | KF, AMC, FOX  | 1  |
| Penicillins, non-extended spectrum cephalosporin, penicillins & $\beta$ -lactam inhibitors | AMP, KF , AMC | 1  |
| <b>Resistance to two antimicrobial categories (N = 49)</b>                                 |               |    |
| Penicillin, tetracycline                                                                   | AMP, TET      | 19 |
|                                                                                            |               |    |
| Penicillin, folate pathway inhibitors                                                      | AMP, SXT      | 4  |
| Penicillin, aminoglycoside                                                                 | AMP, N        | 1  |
|                                                                                            | AMP, GEN      | 1  |
|                                                                                            |               |    |
| Non-extended spectrum cephalosporin, aminoglycoside                                        | KF, GEN       | 1  |
| Penicillin, fluoroquinolone                                                                | AMP, ENR      | 1  |
|                                                                                            |               |    |
| Non-extended spectrum cephalosporin, fluoroquinolone                                       | KF, ENR       | 1  |
| Penicillin, polymyxin                                                                      | AMP, C        | 1  |
|                                                                                            |               |    |
| Non-extended spectrum cephalosporin, polymyxin                                             | KF, C         | 1  |
| Folate pathway inhibitor, fluoroquinolone                                                  | SXT, ENR      | 7  |
| Folate pathway inhibitor, tetracycline                                                     | SXT, TET      | 2  |
| Aminoglycoside, fluoroquinolone                                                            | N, ENR        | 1  |
|                                                                                            | GEN, ENR      | 1  |
| Polymyxin, Folate pathway inhibitor                                                        | C, SXT        | 2  |
| Polymyxin, fluoroquinolone                                                                 | C, ENR        | 1  |
| Polymyxin, tetracycline                                                                    | C, TET        | 1  |

|                                                            |         |    |
|------------------------------------------------------------|---------|----|
| Penicillin, non-extended spectrum cephalosporin            | AMP, KF | 3  |
| Non-extended spectrum cephalosporin, cephamycin            | KF, FOX | 1  |
| <b>Resistance to one antimicrobial categories (N = 38)</b> |         |    |
| Penicillins                                                | AMP     | 14 |
| Non extended spectrum cephalosporin                        | KF      | 1  |
| Fluoroquinolone                                            | ENR     | 6  |
| Tetracycline                                               | TET     | 5  |
| Aminoglycosides                                            | N       | 4  |
|                                                            | GEN     | 3  |
| Polymyxin                                                  | C       | 3  |
| Folate pathway inhibitor                                   | SXT     | 2  |

AMP, ampicillin/amoxicillin; EFT, ceftiofur; KF, cephalothin; AMC, amoxicillin clavulanic acid; FOX, cefoxitin N, neomycin; GEN, gentamycin; TET, tetracycline; ENR, enrofloxacin; SXT, trimethoprim/sulfamethoxazole; C, Colistin

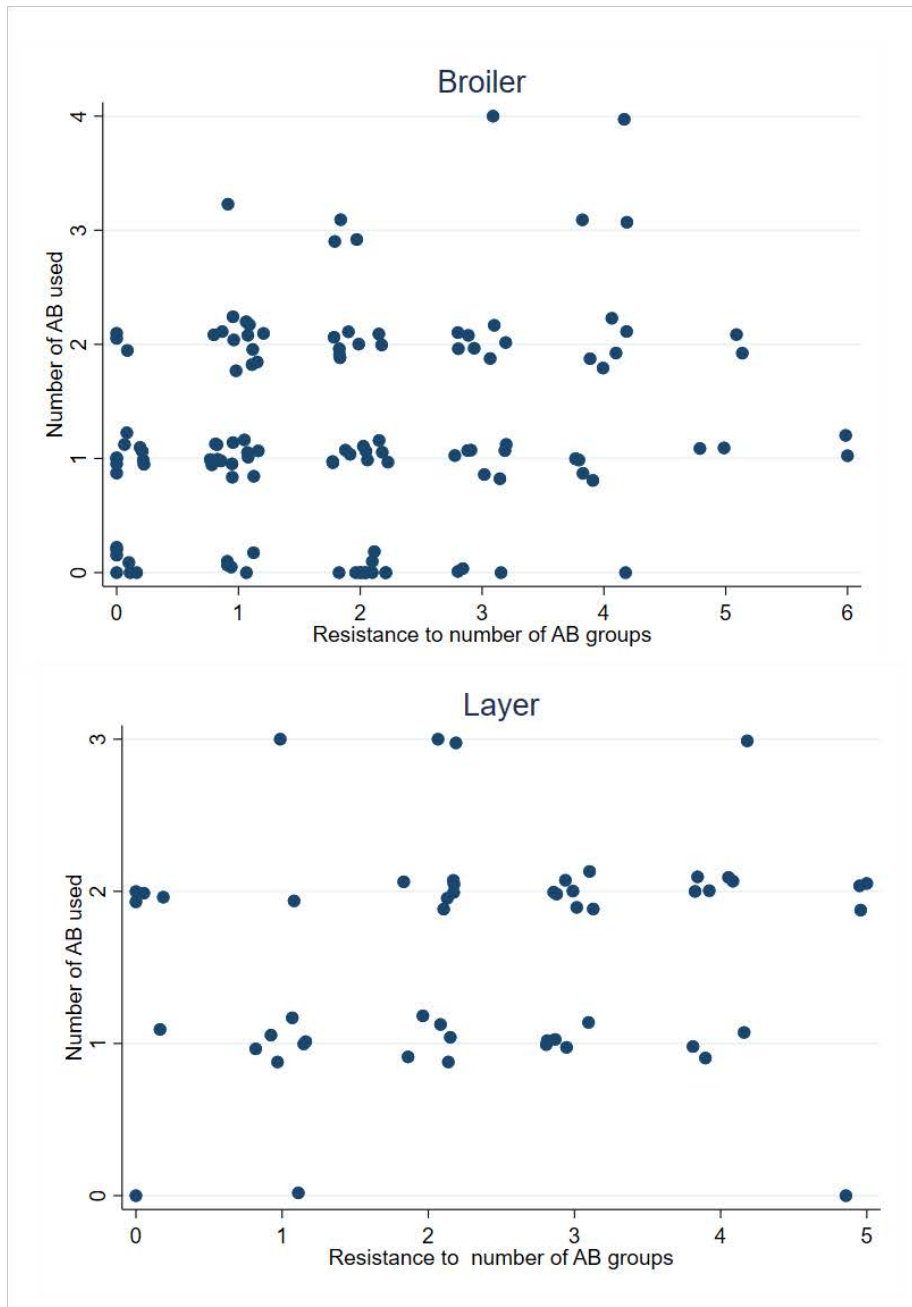

**Supplementary Fig. S1**

Scatterplots of the number of antimicrobials used on farms and the resistance to the number of antimicrobial groups on these farms. Data is presented separately for layer and broilers raised on integrated chicken-fish farms in Myanmar.
